# Supplementary material
Source: PubMed Central journal article supplement (PMC4374745)
Supplement: NIHMS546021-supplement-fig_s1.pdf [file NIHMS546021-supplement-fig_s1.pdf]

Supporting Information Fig. 1.

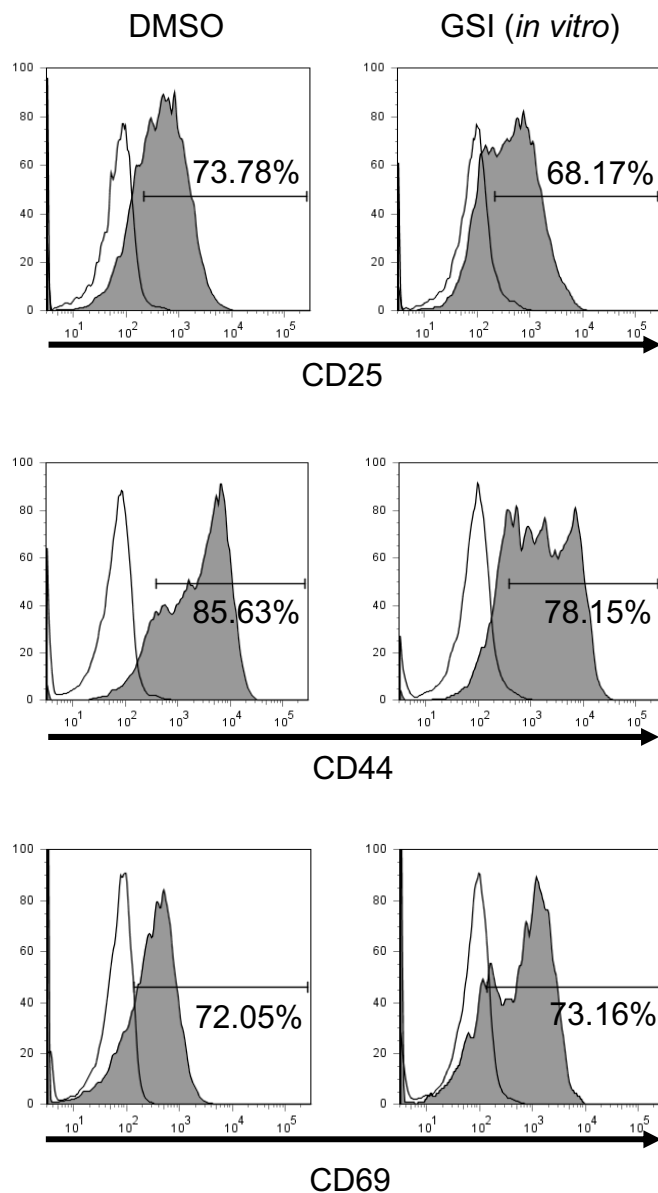

**Supporting information Fig. 1.** To investigate whether GSI blocks the appearance of early activation markers in CD8<sup>+</sup> T cells, splenocytes were activated for 2 days with anti-CD3<sub>ε</sub> and anti-CD28 in the presence of GSI or DMSO control. Following activation, purified CD8<sup>+</sup> T cells were assayed for CD25, CD44 and CD69 expression. As shown above, treatment with GSI has no discernable effect on early markers of T cell activation in CD8<sup>+</sup> T cells.
