# Supplementary material
Source: PubMed Central journal article supplement (PMC4374745)
Supplement: NIHMS546021-supplement-fig_s2.pdf [file NIHMS546021-supplement-fig_s2.pdf]

Supporting Information Fig. 2.

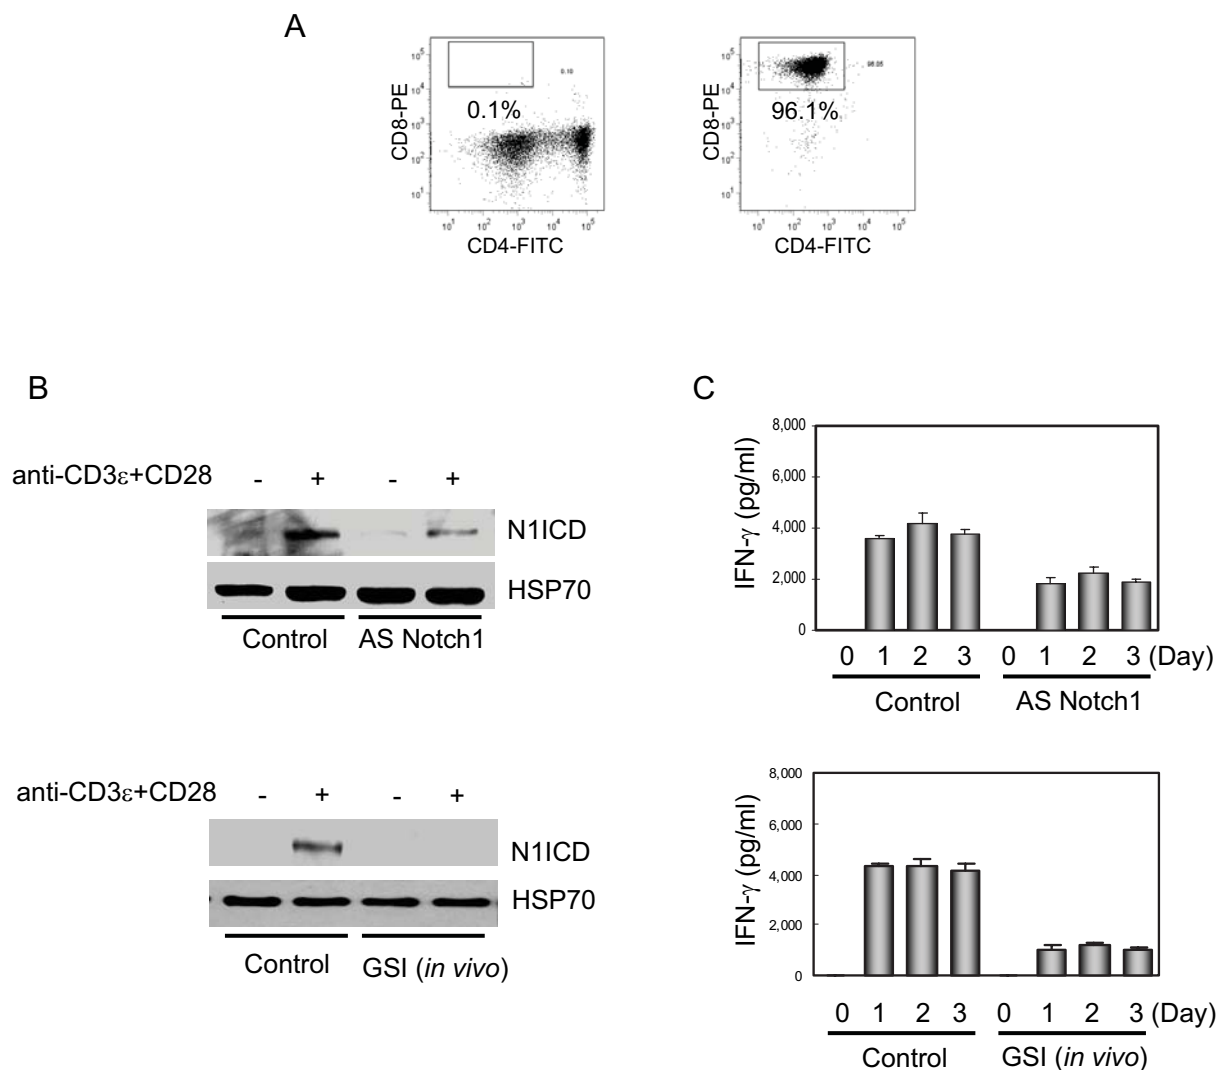

**Supporting information Fig. 2.** (A) We isolated CD8<sup>+</sup> T cells from splenocytes of C57BL/6 mice to >95% purity (*right panel*), treated them with GSI *in vitro*, washed them twice with PBS and mixed them with CD8-depleted antigen presenting cells (APCs) that we purified to >99% (*left panel*). The purity of isolated cells was confirmed in each experiment. (B) N1ICD expression was determined in total lysates from CD8<sup>+</sup> T cells from Notch1 AS mice (*upper panels*) either left unstimulated, or stimulated with anti-CD3 $\epsilon$  plus anti-CD28 for 2 days, or from unstimulated or stimulated splenocytes from *in vivo* GSI-treated mice (*lower panels*). (C) ELISA was used to assess IFN- $\gamma$  levels in the supernatants from similarly-prepared cells, stimulated for 1-3 days. Results in each panel are representative (B) or the mean  $\pm$  s.d (C) of at least two separate experiments.
