# Supplementary material
Source: PubMed Central journal article supplement (PMC4374745)
Supplement: NIHMS546021-supplement-fig_s3.pdf [file NIHMS546021-supplement-fig_s3.pdf]

Supporting Information Fig. 3.

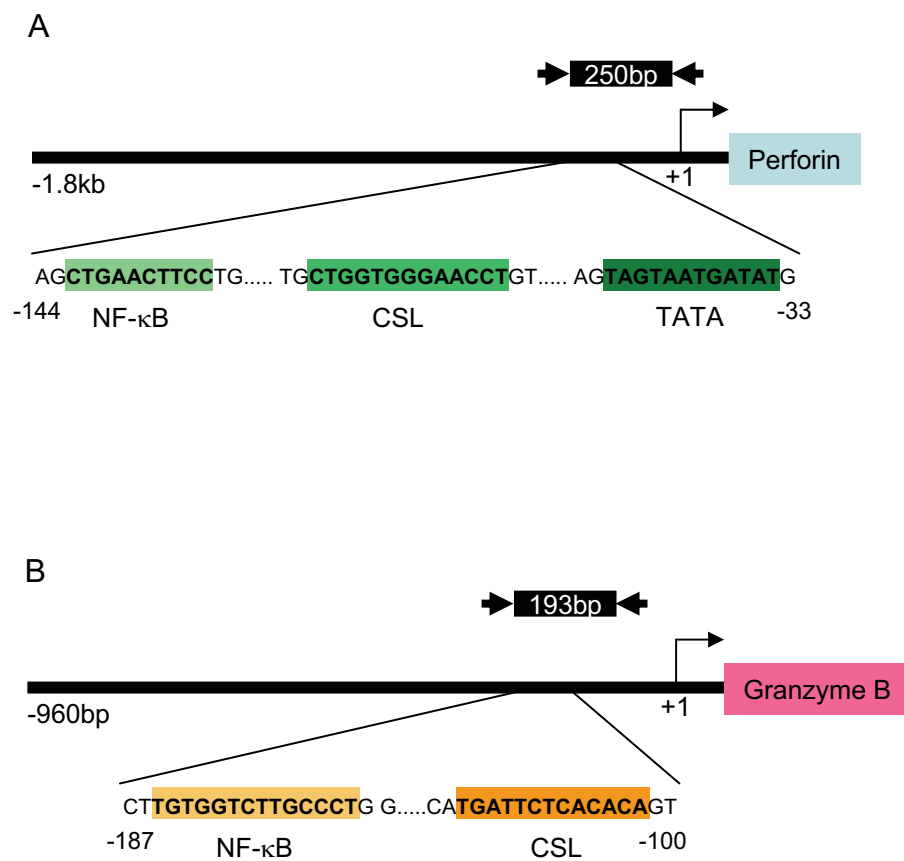

**Supporting information Fig. 3.** For ChIP analysis of the mouse (A) perforin and (B) granzyme B promoters, we identified consensus binding sites for CSL and NF- $\kappa$ B upstream of the respective start sites, and designed primers to amplify these regions using PCR.
