# Supplementary material
Source: PubMed Central journal article supplement (PMC4374745)
Supplement: NIHMS546021-supplement-fig_s4.pdf [file NIHMS546021-supplement-fig_s4.pdf]

Supporting Information Fig. 4.

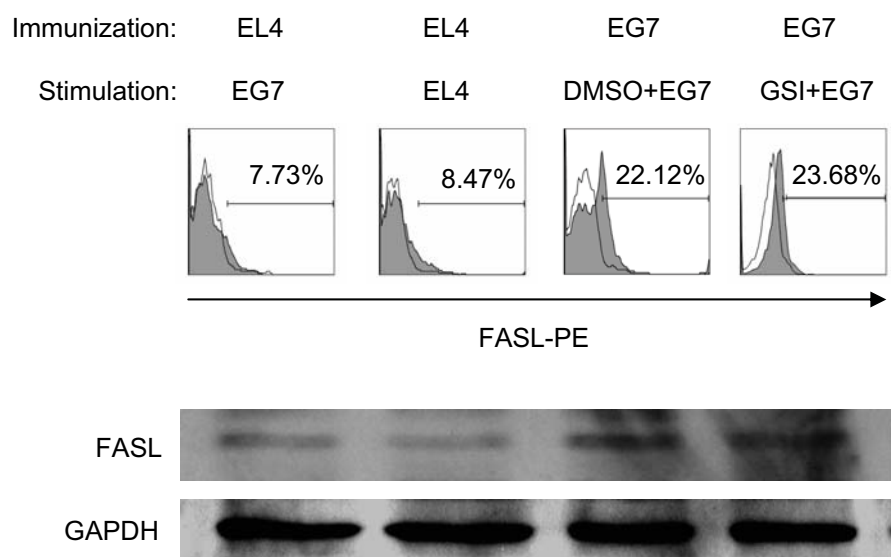

**Supporting information Fig. 4.** We evaluated FASL expression of OVA-specific CD8<sup>+</sup> T cells by flow cytometric analysis after cell-surface staining and immunoblotting of whole cell lysates. Open peaks indicate isotype cont rols. Results are representative of three separate experiments.
