# Supplementary material
Source: PubMed Central journal article supplement (PMC4374745)
Supplement: NIHMS546021-supplement-fig_s5.pdf [file NIHMS546021-supplement-fig_s5.pdf]

Supporting Information Fig. 5.

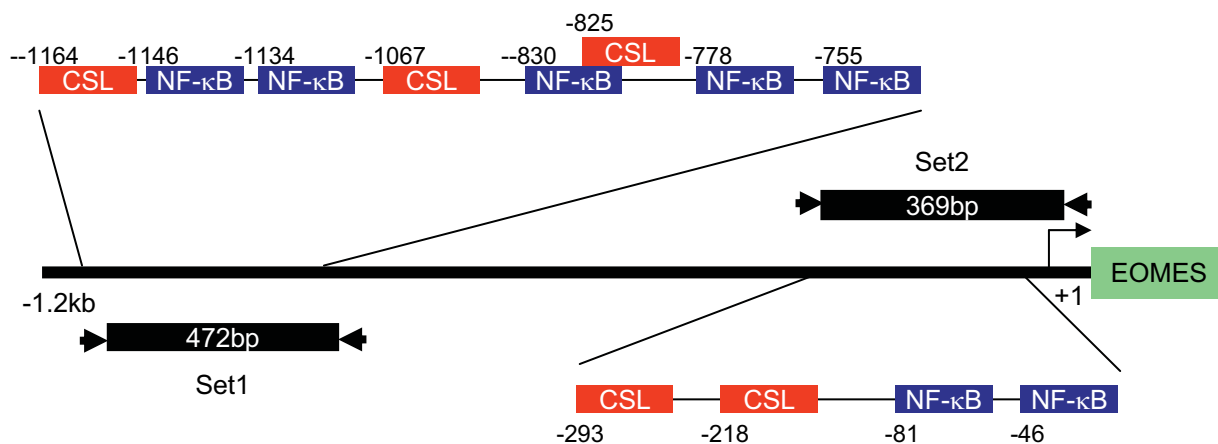

**Supporting information Fig. 5.** We designed two sets of primers to amplify the mouse EOMES promoter containing consensus CSL- and NF- $\kappa$  B-binding motifs. Primer set1 contains 3 binding sites for CSL and 5 binding sites for NF- $\kappa$  B (>75% homology scores); primer set2 contains two putative binding sites for each.
