# Supplementary material
Source: PubMed Central journal article supplement (PMC4374745)
Supplement: NIHMS546021-supplement-fig_s6.pdf [file NIHMS546021-supplement-fig_s6.pdf]

Supporting Information Fig. 6.

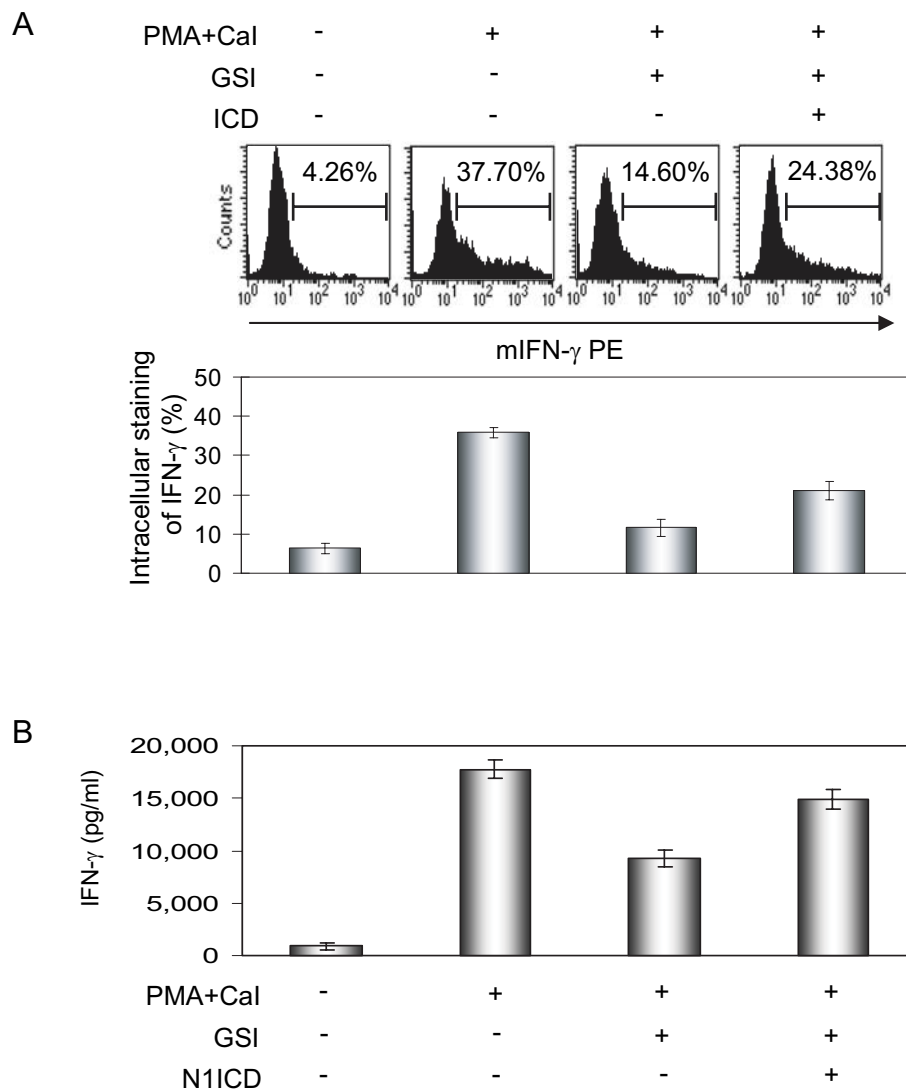

**Supporting information Fig. 6.** We pretreated CD8<sup>+</sup> T cells with GSI, restored N1ICD expression by retroviral transduction, and stimulated cells with anti-CD3 $\epsilon$  plus and anti-CD28 for 2 days. We then re-treated cells with GSI and stimulated them with PMA and Cal to assess the effects of (A, upper panels) ectopic N1ICD expression on IFN- $\gamma$  production by (A, lower panel) intracellular staining and by (B) ELISA. Infection efficiency using retroviral infection was approximately ~50% (data not shown). Intracellular staining is representative (histogram) or the mean  $\pm$  s.d. of three separate experiments; ELISA data represent the mean  $\pm$  s.d. of three independent replicates.
