# Supplementary material
Source: PubMed Central journal article supplement (PMC4374745)
Supplement: NIHMS546021-supplement-fig_s7.pdf [file NIHMS546021-supplement-fig_s7.pdf]

Supporting Information Fig. 7.

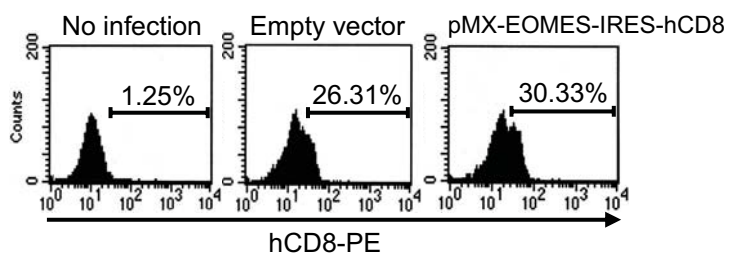

**Supporting information Fig. 7.** We evaluated the infection efficiency for retroviral EOMES gene-transduction. Efficiency were evaluated in every rescue-experiment and results were derived from the experiment in Fig. 7C.
